# Supplementary material for: Palladium supported on hollow magnetic mesoporous spheres: a recoverable catalyst for hydrogenation and Suzuki reaction
Source: Royal Society of Chemistry journal article supplement (doi:10.1039/c5nj00104h), 2015-01-01
Supplement: c5nj00104h1.pdf [file c5nj00104h1.pdf]

Electronic Supplementary Information

**Palladium supported on hollow magnetic mesoporous  
spheres: a recoverable catalyst for hydrogenation and  
Suzuki reaction**

Hengzhi Liu, Peng Wang, Honglei Yang, Jianrui Niu and Jiantai Ma.\*

The catalytic conversion was estimated using GC (P.E. AutoSystem XL) or GC-MS (Agilent 6890N/5973N). The GC analysis conditions were as follows: FID, SE-54 capillary column (30m · 0.32mm · 0.331m), N<sub>2</sub> carrier gas.

1. The temperature program of analysis of hydrogenation reaction conversion:

Gasification chamber temperature 230 °C;

Testing chamber temperature 240 °C;

Column temperature: starting temperature of 60 °C and retention time of 2min,  
heating rate 10 °C/min, heated to 230 °C and retention time of 5min.

2. The temperature program of analysis of Suzuki reaction conversion:

Gasification chamber temperature 220 °C;

Testing chamber temperature 230 °C;

Column temperature: starting temperature of 70 °C and retention time of 2min,  
heating rate 15 °C/min, heated to 220 °C and retention time of 2min.

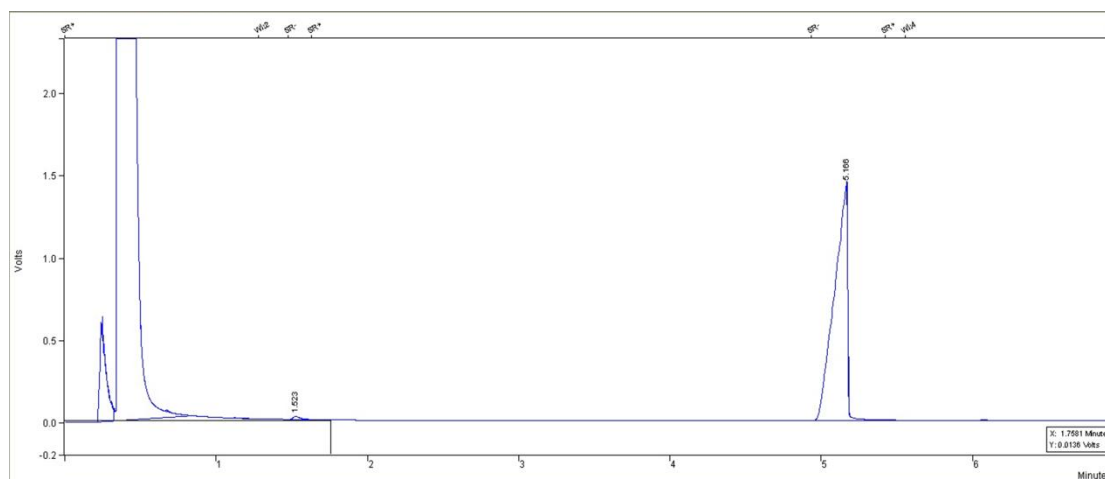

**Fig. S1** Examples of the GC analysis result of Suzuki reaction of Table 4, Entry 1

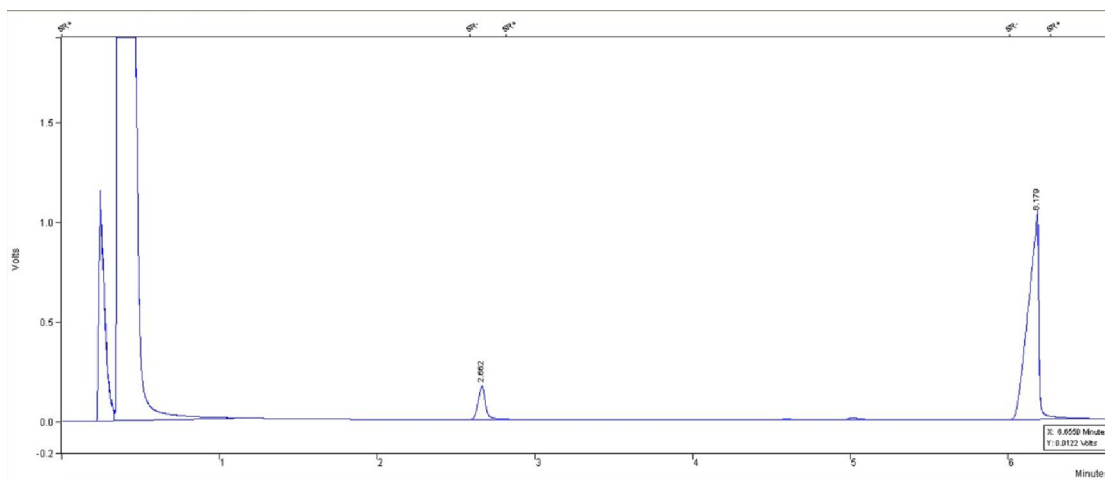

Fig. S2 Examples of the GC analysis result of Suzuki reaction of Table 4, Entry 2

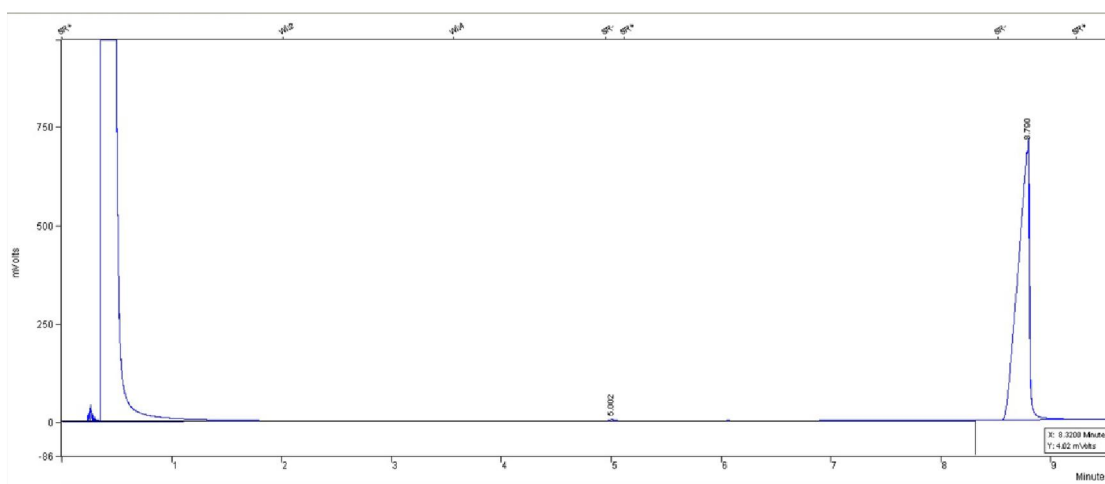

Fig. S3 Examples of the GC analysis result of Suzuki reaction of Table 4, Entry 4
